# Supplementary material for: Prevalence, Diversity, and Virulence of Campylobacter Carried by Migratory Birds at Four Major Habitats in China
Source: MDPI journal article supplement (doi:10.3390/pathogens13030230), 2024-03-06

## Supplemental materials

Table S1. Primer and probe sequences used in this study.

| Purpose                              | Target       |           | Primer sequence                  | Detection                                | Reference <sup>a</sup> | Annealing temperature (°C) | Amplicon Size (bp) |
|--------------------------------------|--------------|-----------|----------------------------------|------------------------------------------|------------------------|----------------------------|--------------------|
| Genus detection                      | 16S          | forward   | GGATGACACTTTTCGGAGC              | Genus                                    | Modified, D Linton[1]  | 55                         | 800                |
|                                      |              | reverse 1 | CATTGTAGCACGTGTGTC               |                                          |                        |                            |                    |
|                                      | 23S          | reverse 2 | CATTGTAGCACGTGTGTA               | Genus                                    | Pholwat, S.[2]         | 60                         | 158                |
|                                      |              | forward   | GATCCAGTGAAATTGTAGTGGAGGT        |                                          |                        |                            |                    |
| Speciation and phylogenetic analysis | <i>atpA</i>  | reverse   | GGCTCATATACAACGGCGTCATA          | <i>C. jejuni/C. coli</i>                 | Modified, Dingle[3]    | 50                         | 1300               |
|                                      |              | probe     | GACGGARAGACCC                    |                                          |                        |                            |                    |
|                                      |              | forward   | ATGGACTTAAGAATATTATGGC           |                                          | Miller[4]              | 53                         | 924                |
|                                      |              | reverse 1 | ATAAATTCCATCTTCAAATTCC           |                                          |                        |                            |                    |
|                                      |              | reverse 2 | CACGYTCAAGTTGTTTTCTACT(sequence) | <i>C. lari</i>                           | This study             | 52                         | 1060               |
|                                      |              | forward   | GARCCAATTGAYGCTAAAGG             |                                          |                        |                            |                    |
|                                      |              | reverse   | TTTAADAVYTCAACCATCTTTGTCC        | <i>C. Sp (RM12651)</i>                   | This study             | 60                         | 1091               |
|                                      |              | forward   | GGTATGGCHTTAAACCTTGAAGA          |                                          |                        |                            |                    |
|                                      |              | reverse   | TGACCACGCTCWARTTGTCTTCT          | <i>C. volucris</i>                       | This study             | 60                         | 1091               |
|                                      |              | forward   | GGTGATGCTTTAATTGGTCGTG           |                                          |                        |                            |                    |
|                                      |              | reverse   | AACGGATACAATGCTGCTTCA            | <i>C. jejuni</i>                         | Hill, J. E[5]          | 60                         | 614                |
|                                      | <i>cpn60</i> | forward   | GATCAAGCAGGCGATGGAAC             |                                          | This study             | 58                         | 665                |
|                                      |              | reverse   | GCTTTTCTTCTATCGCCAAAACCTG        |                                          |                        |                            |                    |
|                                      |              | forward   | CTTGAAAATATGGGYGCTTCAC           | <i>C. coli</i>                           | This study             | 56                         | 707                |
|                                      |              | reverse   | GCTTTTCTTCTATCKCCAAAACCT         |                                          |                        |                            |                    |
|                                      |              | forward   | GAAAATATGGGTGCTTCTTTTGT          | <i>C. lari</i>                           | This study             | 60                         | 651                |
|                                      |              | reverse   | GAAATCACTTCACCACCTGTT            |                                          |                        |                            |                    |
|                                      |              | forward   | CAAGCAGGAGATGGAACACTACAAC        | <i>C. Sp (RM12651)</i>                   | This study             | 60                         | 655                |
|                                      |              | reverse   | CGTTCCACCTGTAAAGATTGC            |                                          |                        |                            |                    |
|                                      |              | forward   | AAGCWGGTGATGGAACAACAAC           | <i>C. ornithocola/ C. subantarcticus</i> | This study             | 59                         | 680                |
|                                      |              | reverse   | GAAATCACTTCGCCACCTGT             |                                          |                        |                            |                    |
|                                      |              | forward   | CTGATCAAGCAGGAGATGGA             | <i>C. volucris</i>                       | This study             | 60                         | 122                |
|                                      |              | reverse   | TGTTCTTCCAAGCTCTTCTGAG           |                                          |                        |                            |                    |
|                                      | <i>hipO</i>  | forward   | CTTGCGGTCATGATGGACATAC           | <i>C. jejuni</i>                         | Liu, J.[6]             | 60                         | 125                |
|                                      |              | reverse   | AGCACCACCCAAACCCTCTTCA           |                                          |                        |                            |                    |
|                                      | <i>glyA</i>  | probe     | TGCTTGCTGCAAAGTATT               | <i>C. coli</i>                           | Liu, J.[6]             | 60                         | 125                |
|                                      |              | forward   | AAACCAAAGCTTATCGTGTGC            |                                          |                        |                            |                    |
|                                      |              | reverse   | AGTGCAGCAATGTGTGCAAT             |                                          |                        |                            |                    |
|                                      |              | probe     | TAAGCTCCAACCTTCATCCG             |                                          |                        |                            |                    |

|           |             |           |                                |                          |               |    |     |
|-----------|-------------|-----------|--------------------------------|--------------------------|---------------|----|-----|
| Virulence | <i>cdtA</i> | forward   | ATCGTACCTCTCCTTGGCG            | <i>C. jejuni</i>         | Poudel, S.[7] | 60 | 440 |
|           |             | reverse   | CGGAGCAGCTTTAACGGTTTG          |                          |               |    |     |
|           |             | forward   | GCCAAGGCTAAAATCTCCAAA          | <i>C. coli</i>           | This study    | 60 | 192 |
|           |             | reverse   | TGCCAAGCTCTTGCATCTC            |                          |               |    |     |
|           |             | forward 1 | CGGTTTGGGCTTTAAATCCA           | <i>C. lari</i>           | This study    | 58 | 388 |
|           |             | reverse 1 | GCACTAATGCTCCATTGTCTAT         |                          |               |    |     |
|           |             | forward 2 | CAGTTTGGGCCTTAAATCCA           |                          |               |    |     |
|           |             | reverse 2 | GCGCTAACACTCCATTGTCTAT         |                          |               |    |     |
|           | <i>cdtB</i> | forward   | TGGGCGATATGTATGATGATG          | <i>C. volucris</i>       | This study    | 60 | 480 |
|           |             | reverse   | TCCAAAATTGAGCTTGATTGC          |                          |               |    |     |
|           |             | forward   | TGGAGGAACAGATGTAGGAGC          | <i>C. jejuni</i>         | Poudel, S.[7] | 60 | 180 |
|           |             | reverse   | GCTTGAGTTGCGCTAGTTGG           |                          |               |    |     |
|           |             | forward   | CTAGYAAGTGGGGGAAATGA           | <i>C. coli</i>           | This study    | 60 | 183 |
|           |             | reverse   | CGTAGAAGAAGGCGGAACAAC          |                          |               |    |     |
|           |             | forward   | AGAGTDGATGTTGGRGCAAAT          | <i>C. lari</i>           | This study    | 60 | 304 |
|           |             | reverse   | TACGCGMTCTTAAATCHGSATCA        |                          |               |    |     |
|           | <i>cdtC</i> | forward   | AAAATCACCTGCAACCATCC           | <i>C. volucris</i>       | This study    | 60 | 464 |
|           |             | reverse   | CTGCAACCACAGAAAGCAAA           |                          |               |    |     |
|           |             | forward   | GCTCCAAAGGTTCATCTTCTAAG        | <i>C. jejuni</i>         | This study    | 60 | 269 |
|           |             | reverse   | GCCTTTGCAACTCCTACTGG           |                          |               |    |     |
|           |             | forward   | GCCTAGCTTGGATGAATTAG           | <i>C. coli</i>           | This study    | 60 | 411 |
|           |             | reverse   | TCTATGGCGATACTAGAGTCAG         |                          |               |    |     |
|           |             | forward   | GCAGTTTATAAAYCCTAGAGGTGCTG     | <i>C. lari</i>           | This study    | 60 | 315 |
|           |             | reverse   | GGAGTTGCTTCAACRATAGCAG         |                          |               |    |     |
|           | <i>cadF</i> | forward   | TCTAAACCGAAACGCTGCTC           | <i>C. volucris</i>       | This study    | 60 | 430 |
|           |             | reverse   | GCGTTTGCTGAGATGGAATC           |                          |               |    |     |
|           |             | forward   | CTGCTAAACCATAGAAATAAAATTTCTCAC | <i>C. jejuni/C. coli</i> | Liu, J. [6]   | 60 | 221 |
|           |             | reverse   | CTTTGAAGGTAATTTAGATATGGATAATCG |                          |               |    |     |
|           |             | forward   | GCTCAATATGGTGCRGGTTT           | <i>C. lari</i>           | This study    | 60 | 259 |
|           |             | reverse   | CACAACCTATATGATCAAGCAAAGC      |                          |               |    |     |
|           |             | forward   | TGGTTATGAGCACCAAAAAGG          | <i>C. Sp (RM12651)</i>   | This study    | 60 | 674 |
|           |             | reverse   | TGTCTTCGCTAACACCAGCTT          |                          |               |    |     |
|           | <i>flaA</i> | forward   | GTGGTATGTTTGCCCAATATGGT        | <i>C. volucris</i>       | This study    | 60 | 249 |
|           |             | reverse   | AGGCACCTTTTCTTGTTCTG           |                          |               |    |     |
|           |             | forward   | ATGCTTCAGGGATGGCGATA           | <i>C. jejuni/C. coli</i> | This study    | 60 | 178 |
|           |             | reverse   | CCATCTTGAGCCGCTTGAGT           |                          |               |    |     |
|           |             | Forward 2 | GATGATGCTTCKGGKATGGCTA         | <i>C. lari</i>           | This study    | 59 | 192 |
|           |             | reverse 2 | AGTRCTTTGWCCATCTTGWGC          |                          |               |    |     |
|           |             | forward   | TAACTCTGCTGCTGATGATGCT         | <i>C. Sp (RM12651)</i>   | This study    | 60 | 229 |
|           |             | reverse   | AGCTTGAAGTGAGCGTCTTGTT         |                          |               |    |     |
|           | <i>flaA</i> | forward   | AGATGATGCTTCAGGTATGGCTA        | <i>C. volucris</i>       | This study    | 60 | 193 |
|           |             | reverse   |                                |                          |               |    |     |

|                  |                    |                            |                        |                |    |     |
|------------------|--------------------|----------------------------|------------------------|----------------|----|-----|
|                  | reverse            | AGTGCTTTGCCCATCTTGAG       |                        |                |    |     |
|                  | forward 1          | ATGCTTCAGGTATGGCTATTG      | <i>C. volucris</i>     | This study     | 56 | 418 |
|                  | reverse 1          | CTACTTTTAGCTTGAGATCCTGTT   |                        |                |    |     |
| <i>cheY</i>      | forward            | TGATGACAGTTCTACTATGAGAAGG  | <i>C. jejuni</i>       | This study     | 56 | 362 |
|                  | reverse            | CTTCTCCACTTCCTGTTCT        |                        |                |    |     |
|                  | forward            | TGATGACAGTTCTACTATGAGAAGG  | <i>C. coli</i>         | This study     | 56 | 283 |
|                  | reverse            | CAGTAATCACCTCAGCCTTG       |                        |                |    |     |
|                  | forward            | GATGTTGATGATAGTTCTACCATGAG | <i>C. lari</i>         | This study     | 56 | 248 |
|                  | reverse            | CCACCTTCTGTWGTACCATGA      |                        |                |    |     |
|                  | forward            | CAAAGATTAGGTCATGAGGATG     | <i>C. Sp (RM12651)</i> | This study     | 56 | 210 |
|                  | reverse            | TTCTGCTTTACCACCTTCAG       |                        |                |    |     |
|                  | forward            | GATGTTTTAGAGGCTGAGCA       | <i>C. volucris</i>     | This study     | 56 | 198 |
|                  | reverse            | TTCAGCTTTACCACCTTCTG       |                        |                |    |     |
| <i>CiaB</i>      | forward            | AGCTGAATTTGCTTGGAATGA      | <i>C. jejuni</i>       | This study     | 58 | 279 |
|                  | reverse            | CCATAAAATATCATCGGAGTGC     |                        |                |    |     |
|                  | forward            | GGCTGAATTTGCATGGATGA       | <i>C. coli</i>         | This study     | 60 | 306 |
|                  | reverse            | GCAGAAAACAAACCTTAAGCTC     |                        |                |    |     |
|                  | forward            | GTTCAAGGTGTGCATAATATAGGTGT | <i>C. lari</i>         | This study     | 58 | 704 |
|                  | reverse            | CCCTTAAGCTCTGTCYCCATAA     |                        |                |    |     |
|                  | forward            | AGACTTCATTCAAGTTGGGCATT    | <i>C. Sp (RM12651)</i> | This study     | 60 | 493 |
|                  | reverse            | TTCGTGTCCAATGGTGCTAA       |                        |                |    |     |
|                  | forward            | AGCTGAACTTGCATGGATGG       | <i>C. volucris</i>     | This study     | 60 | 298 |
|                  | reverse            | AAGTCCTTTAAGCTCTGCTCCA     |                        |                |    |     |
| <i>gluP</i>      | forward            | AGCTCCACCCCAATAATAAGC      | <i>C. Sp (RM12651)</i> | This study     | 60 | 604 |
|                  | reverse            | TCAAAATGGTGTTGTAGGTGGA     |                        |                |    |     |
| <i>hlyB</i>      | forward            | TAGTTTGCTCTTGCGGTGTAT      | <i>C. Sp (RM12651)</i> | This study     | 58 | 695 |
|                  | reverse            | CGCAAAATTAGGCAGTGAGT       |                        |                |    |     |
| <i>pgiB</i>      | forward            | TGGATGATGTAAATGCAGTGCT     | <i>C. Sp (RM12651)</i> | This study     | 60 | 662 |
|                  | reverse            | TGCGATTATATGTGARCCACCA     |                        |                |    |     |
| <i>gyrA</i> T86I | forward            | GCCCGTATAGTGGGTGCTGT       | <i>C. jejuni</i>       | Pholwat, S.[2] | 60 | 86  |
|                  | reverse            | TCTTGAGCCATTCTAACCAGAGC    | fluoroquinolone        |                |    |     |
|                  | probe <sup>W</sup> | ATAAACTGCTGTATCTC          | resistance             |                |    |     |
|                  | probe <sup>M</sup> | AACTGCTATATCTCC            |                        |                |    |     |
| 23S<br>A2075G    | forward            | GATCCAGTGAAATTGTAGTGGAGGT  | <i>Campylobacter</i>   | Pholwat, S.[2] | 60 | 158 |
|                  | reverse            | GGCTCATATACAACCTGGCGTCATA  | macrolide              |                |    |     |
|                  | probe <sup>M</sup> | GACGGAAAGACC               | resistance             |                |    |     |
|                  | Probe <sup>W</sup> | GACGGAGAGACCC              |                        |                |    |     |

<sup>a</sup> The original primers and probes were used as previously published if it was not indicated as “Modified” or “This study”.

## Reference

1. Linton, D.; Owen, R.J.; Stanley, J. Rapid identification by PCR of the genus *Campylobacter* and of five *Campylobacter* species enteropathogenic for man and animals. *Res Microbiol* **1996**, *147*, 707-718, doi:10.1016/s0923-2508(97)85118-2.
2. Pholwat, S.; Pongpan, T.; Chinli, R.; Rogawski McQuade, E.T.; Thaipisuttikul, I.; Ratanakorn, P.; Liu, J.; Taniuchi, M.; Houpt, E.R.; Foongladda, S. Antimicrobial Resistance in Swine Fecal Specimens Across Different Farm Management Systems. *Front Microbiol* **2020**, *11*, 1238, doi:10.3389/fmicb.2020.01238.
3. Dingle, K.E.; Colles, F.M.; Wareing, D.R.; Ure, R.; Fox, A.J.; Bolton, F.E.; Bootsma, H.J.; Willems, R.J.; Urwin, R.; Maiden, M.C. Multilocus sequence typing system for *Campylobacter jejuni*. *J Clin Microbiol* **2001**, *39*, 14-23, doi:10.1128/jcm.39.1.14-23.2001.
4. Miller, W.G.; On, S.L.; Wang, G.; Fontanoz, S.; Lastovica, A.J.; Mandrell, R.E. Extended multilocus sequence typing system for *Campylobacter coli*, *C. lari*, *C. upsaliensis*, and *C. helveticus*. *J Clin Microbiol* **2005**, *43*, 2315-2329, doi:10.1128/jcm.43.5.2315-2329.2005.
5. Hill, J.E.; Paccagnella, A.; Law, K.; Melito, P.L.; Woodward, D.L.; Price, L.; Leung, A.H.; Ng, L.K.; Hemmingsen, S.M.; Goh, S.H. Identification of *Campylobacter* spp. and discrimination from *Helicobacter* and *Arcobacter* spp. by direct sequencing of PCR-amplified *cpn60* sequences and comparison to *cpnDB*, a chaperonin reference sequence database. *J Med Microbiol* **2006**, *55*, 393-399, doi:10.1099/jmm.0.46282-0.
6. Liu, J.; Gratz, J.; Amour, C.; Nshama, R.; Walongo, T.; Maro, A.; Mduma, E.; Platts-Mills, J.; Boisen, N.; Nataro, J.; et al. Optimization of Quantitative PCR Methods for Enteropathogen Detection. *PLoS One* **2016**, *11*, e0158199, doi:10.1371/journal.pone.0158199.
7. Poudel, S.; Li, T.; Chen, S.; Zhang, X.; Cheng, W.H.; Sukumaran, A.T.; Kiess, A.S.; Zhang, L. Prevalence, Antimicrobial Resistance, and Molecular Characterization of *Campylobacter* Isolated from Broilers and Broiler Meat Raised without Antibiotics. *Microbiol Spectr* **2022**, *10*, e0025122, doi:10.1128/spectrum.00251-22.

Table S2. Distribution of *Campylobacter* detected in different migratory bird species at 4 habitats.

| Migratory birds<br>Order | Family            | Genus                               | Hebei | Heilongjiang | Qinghai | Xizang | Total |
|--------------------------|-------------------|-------------------------------------|-------|--------------|---------|--------|-------|
| Anseriformes             | Anatidae          | <i>Anas platyrhynchos</i>           |       | 2            |         |        | 2     |
|                          |                   | <i>Anser albifrons/fabalis</i>      | 1     | 31           | 1       |        | 33    |
|                          |                   | <i>Anser anser/Anser erythropus</i> |       |              | 4       | 1      | 5     |
|                          |                   | <i>Anser indicus</i>                | 13    |              | 11      | 47     | 71    |
|                          |                   | <i>Aythya nyroca</i>                |       |              | 1       |        | 1     |
| Charadriiformes          | Laridae           | <i>Chlidonias leucopterus</i>       | 1     |              |         |        | 1     |
|                          |                   | <i>Chroicocephalus ridibundus</i>   | 16    |              |         | 1      | 17    |
|                          |                   | <i>Ichthyaetus relictus</i>         | 1     |              |         |        | 1     |
|                          |                   | <i>Larus argentatus</i>             | 1     |              |         |        | 1     |
|                          | Scolopacidae      | <i>Numenius arquata</i>             | 2     |              |         |        | 2     |
|                          |                   | <i>Tringa erythropus</i>            |       |              |         | 1      | 1     |
|                          | Recurvirostridae  | <i>Recurvirostra avosetta</i>       | 2     |              |         |        | 2     |
|                          | Charadriidae      | <i>Charadrius placidus</i>          | 1     |              |         |        | 1     |
|                          |                   | <i>Pluvialis squatarola</i>         | 1     |              |         |        | 1     |
| Suliformes               | Phalacrocoracidae | <i>Phalacrocorax carbo</i>          | 4     |              |         | 1      | 5     |
| Strigiformes             | Strigidae         | <i>Athene noctua</i>                | 1     |              |         |        | 1     |
| Falconiformes            | Falconidae        | <i>Falco peregrinus</i>             |       | 1            |         |        | 1     |
| Total                    |                   |                                     | 44    | 34           | 17      | 51     | 146   |

Table S3. Detection of virulence genes in 5 *Campylobacter* species.

| Virulence gene | Function          | Detection Rate (%)* |                |                |                    |              |
|----------------|-------------------|---------------------|----------------|----------------|--------------------|--------------|
|                |                   | <i>C. jejuni</i>    | <i>C. coli</i> | <i>C. lari</i> | <i>C. volucris</i> | RM12651-like |
| <i>cdtA</i>    | Exotoxin          | 76.5 (13/17)        | 66.7 (2/3)     | 81.8 (9/11)    | 75.0 (3/4)         | -            |
| <i>cdtB</i>    | Exotoxin          | 76.5 (13/17)        | 66.7 (2/3)     | 81.8 (9/11)    | 50.0 (2/4)         | -            |
| <i>cdtC</i>    | Exotoxin          | 23.5 (4/17)         | 33.3 (1/3)     | 81.8 (9/11)    | 50.0 (2/4)         | -            |
| <i>cadF</i>    | Adherence         | 70.6 (12/17)        | 33.3 (1/3)     | 91.7 (11/12)   | 100.0 (4/4)        | 84.3 (59/70) |
| <i>cheY</i>    | Motility          | 86.7 (13/15)        | 66.7 (2/3)     | 91.7 (11/12)   | 100.0 (4/4)        | 86.3 (63/73) |
| <i>flaA</i>    | Motility          | 93.3 (14/15)        | 66.7 (2/3)     | 100.0 (12/12)  | 75.0 (3/4)         | 91.8 (67/73) |
| <i>ciaB</i>    | Invasion          | 80.0 (12/15)        | 100.0 (3/3)    | 83.3 (10/12)   | 100.0 (4/4)        | 84.3 (59/70) |
| <i>gluP</i>    | Immune modulation | -                   | -              | -              | -                  | 75.7 (53/70) |
| <i>pgiB</i>    | Immune modulation | -                   | -              | -              | -                  | 78.1 (57/73) |
| <i>hlyB</i>    | Exotoxin          | -                   | -              | -              | -                  | 72.6 (53/73) |

\*Due to the availability of the samples, no test was done on a few samples. Only samples with complete tests were included for Figure 2 and Figure 3B.

#### Supplemental Figure Legends

Figure S1. Phylogenetic analysis based on 16S rRNA gene in different habitats and migratory birds. Fasttree was used to construct the tree. *Helicobacter* was used as an outgroup. The figure was prepared with iTOL (Interactive Tree of Life). Different colors in the two columns represent different regions and birds, respectively. The Bootstrap value is displayed only when <0.7.

Tree scale: 0.1

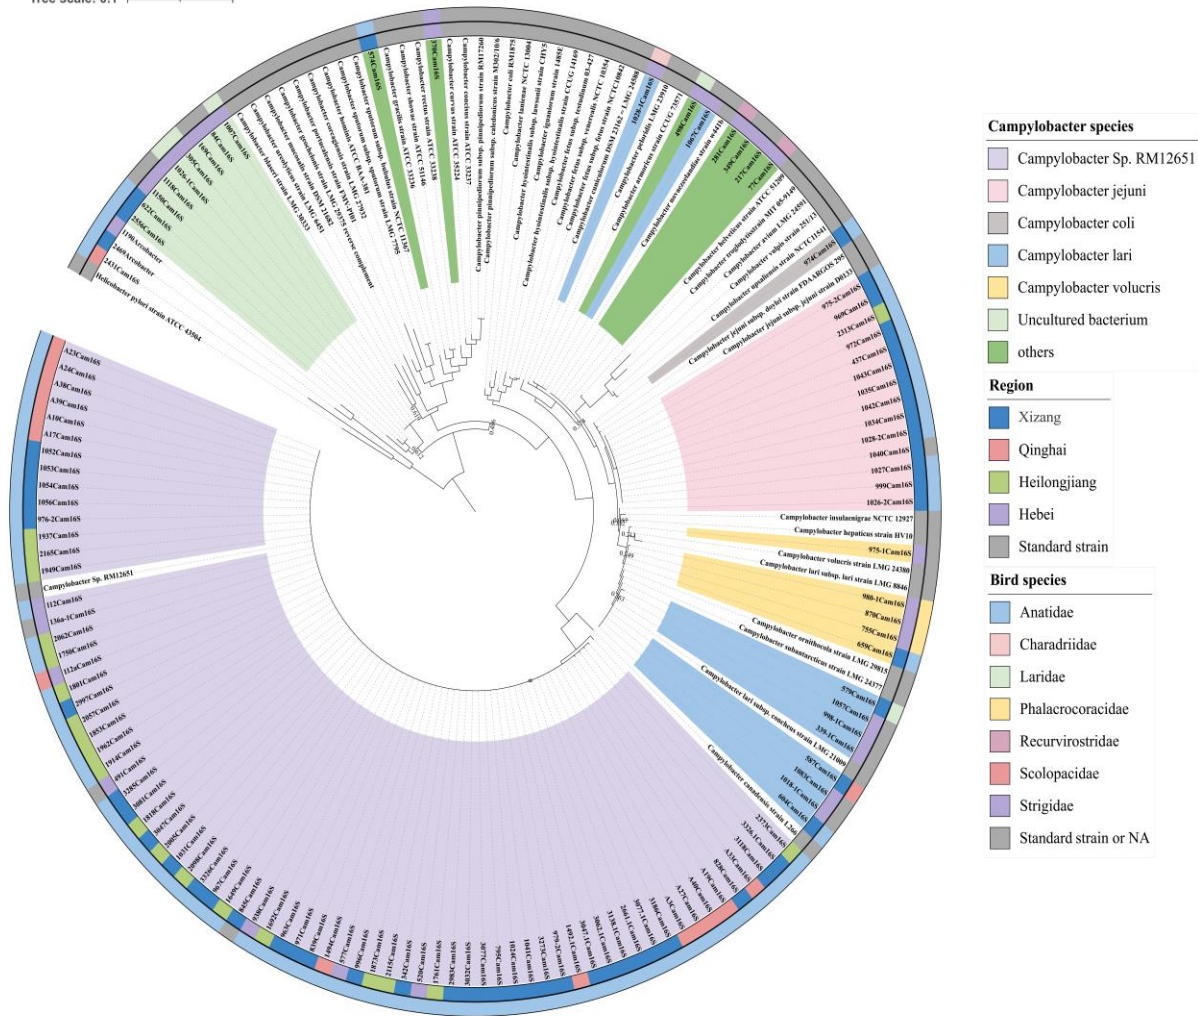

Supplement: s1 [file s1]
